# Supplementary material for: Cyclometalated ruthenium(ii) complexes with bis(benzimidazolyl)benzene for dye-sensitized solar cells
Source: Royal Society of Chemistry journal article supplement (doi:10.1039/c5ra20294a), 2015-01-01
Supplement: c5ra20294a1.pdf [file c5ra20294a1.pdf]

Supporting Information for:

**Cyclometalated Ruthenium(II) Complexes with  
Bis(benzimidazolyl)benzene for Dye-Sensitized Solar Cells**

*Jiang-Yang Shao, Nianqing Fu, Wen-Wen Yang, Chun-Yu Zhang, Yu-Wu Zhong\**,

*Yuan Lin,\* and Jiannian Yao*

Beijing National Laboratory for Molecular Sciences, CAS Key Laboratory of Photochemistry, Institute of Chemistry, Chinese Academy of Sciences, Beijing 100190, China.

\*Email: [zhongyuwu@iccas.ac.cn](mailto:zhongyuwu@iccas.ac.cn) (Y.-W.Z.); [linyuan@iccas.ac.cn](mailto:linyuan@iccas.ac.cn) (Y.L.)

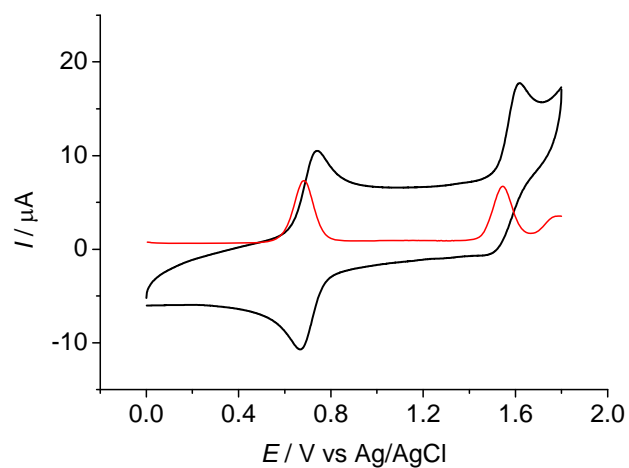

**Figure S1.** CV and DPV of **1a** in acetonitrile.

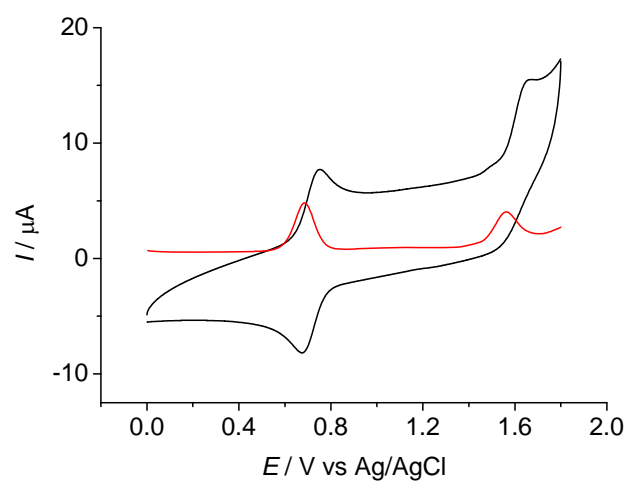

**Figure S2.** CV and DPV of **3a** in acetonitrile.

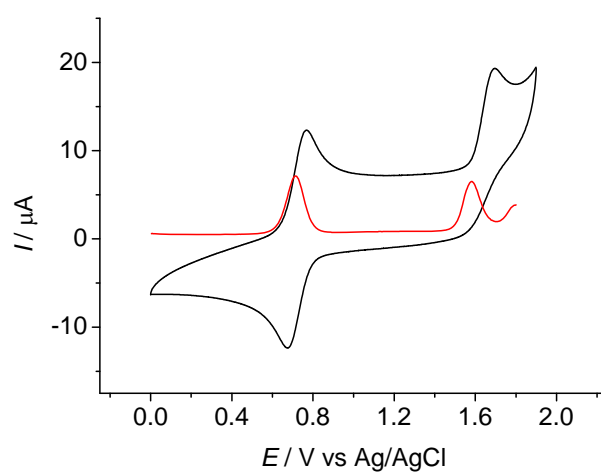

**Figure S3.** CV and DPV of **4a** in acetonitrile.

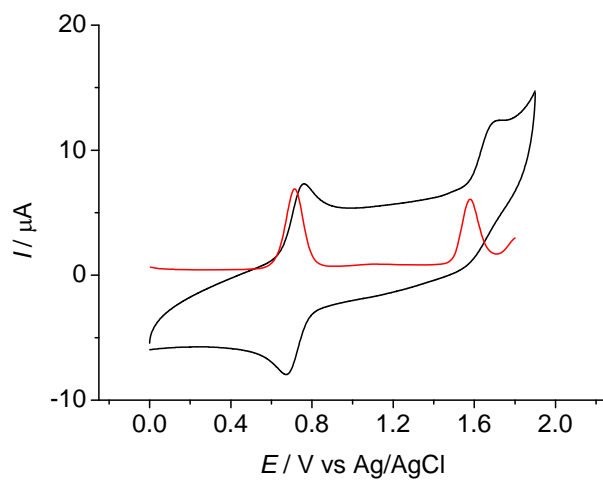

**Figure S4.** CV and DPV of **5a** in acetonitrile.

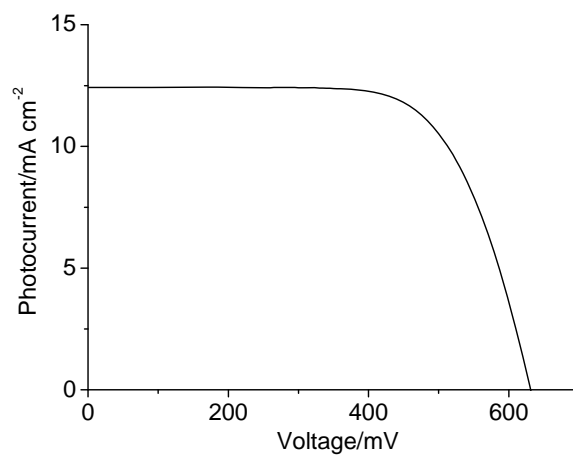

**Figure S5.** Photocurrent density-voltage characteristic of the device using N3 sensitizers.

$^1\text{H}$  and  $^{13}\text{C}$  NMR and mass spectra of **L4**:

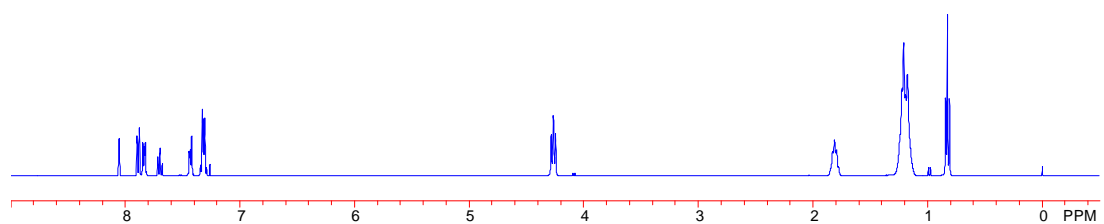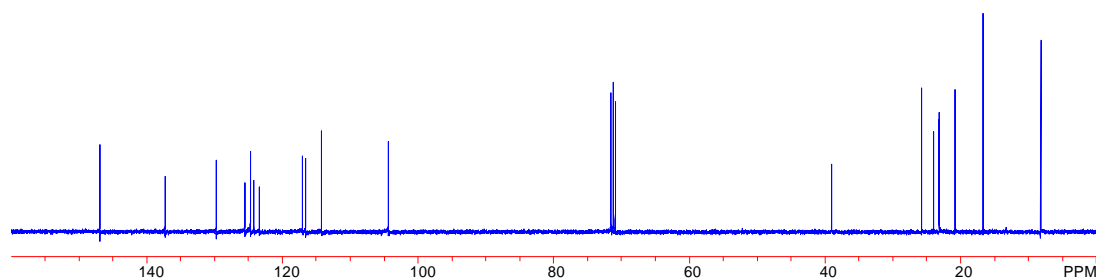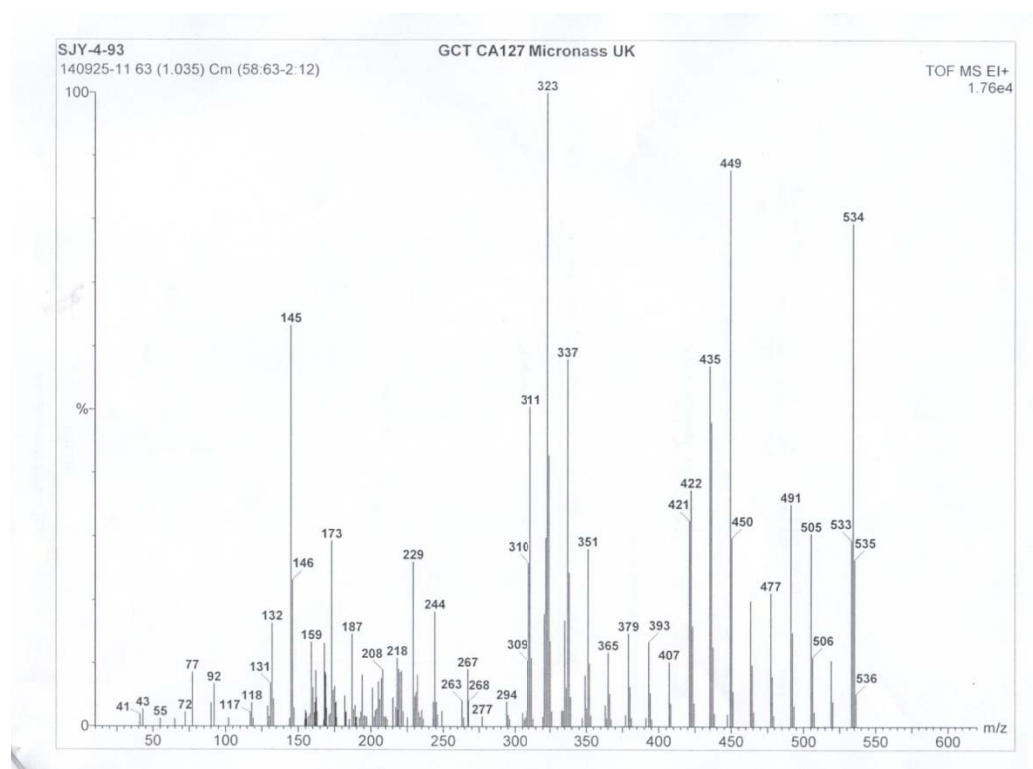

$^1\text{H}$  and  $^{13}\text{C}$  NMR and mass spectra of **L5**:

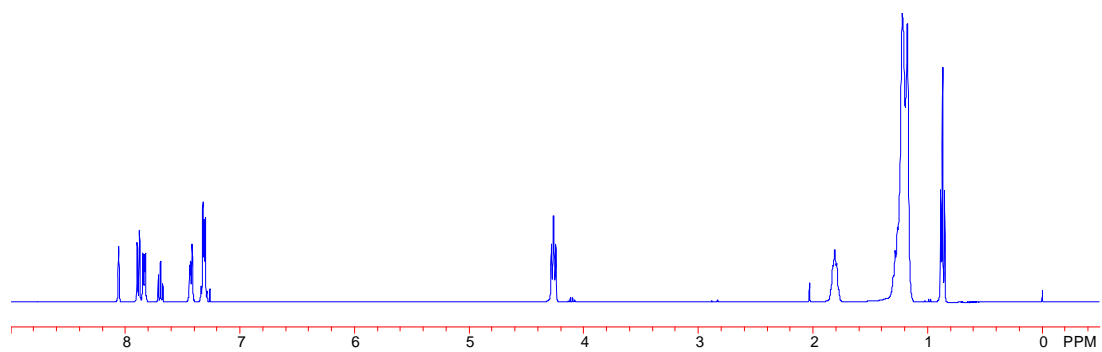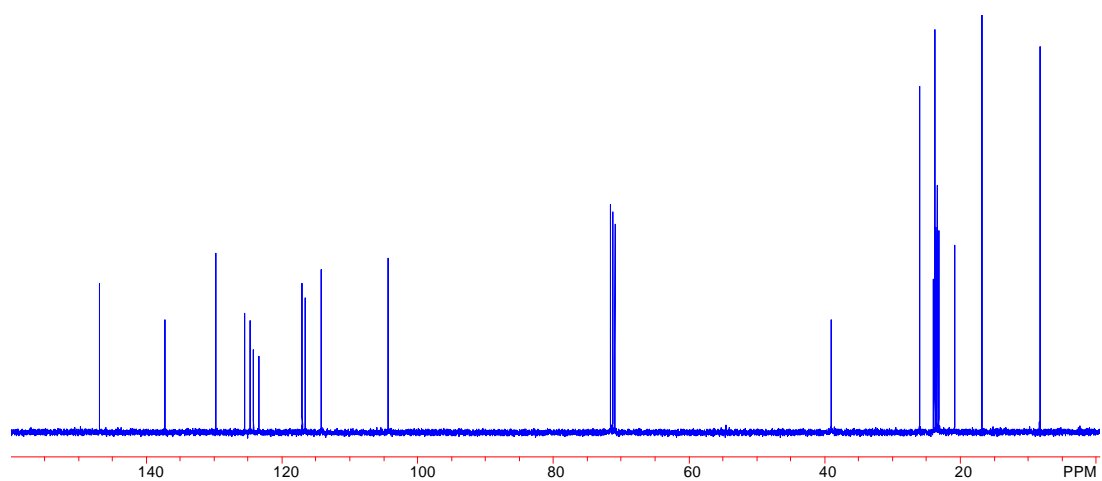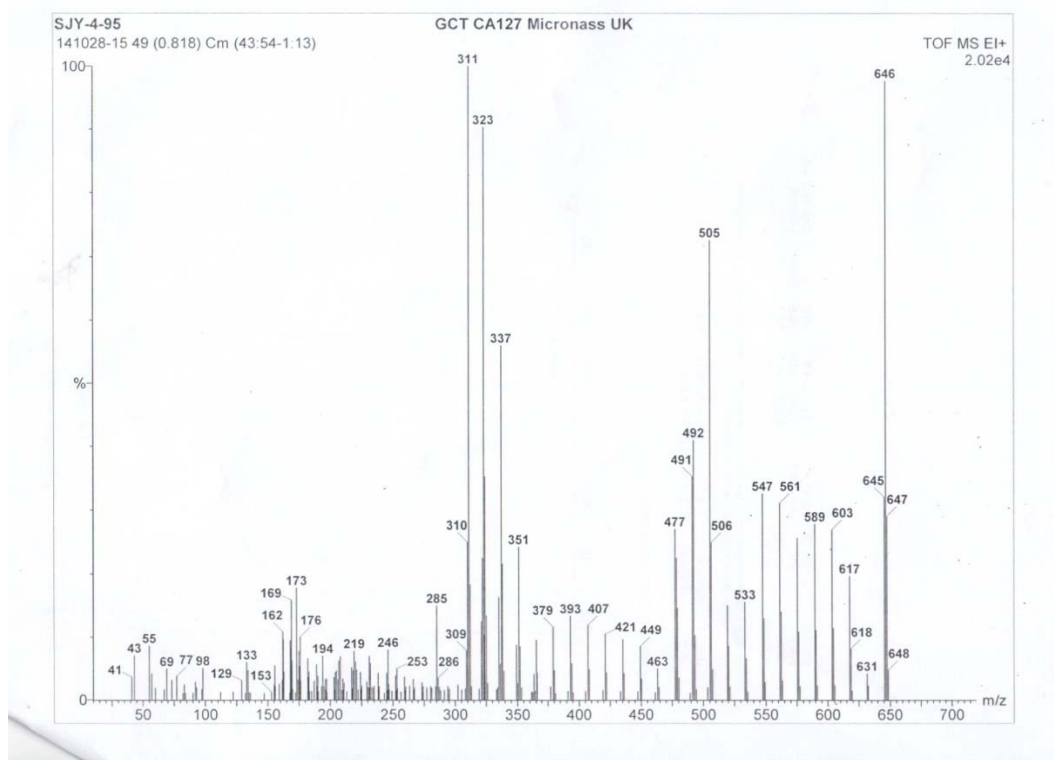

$^1\text{H}$  and  $^{13}\text{C}$  NMR and mass spectra of **1a**:

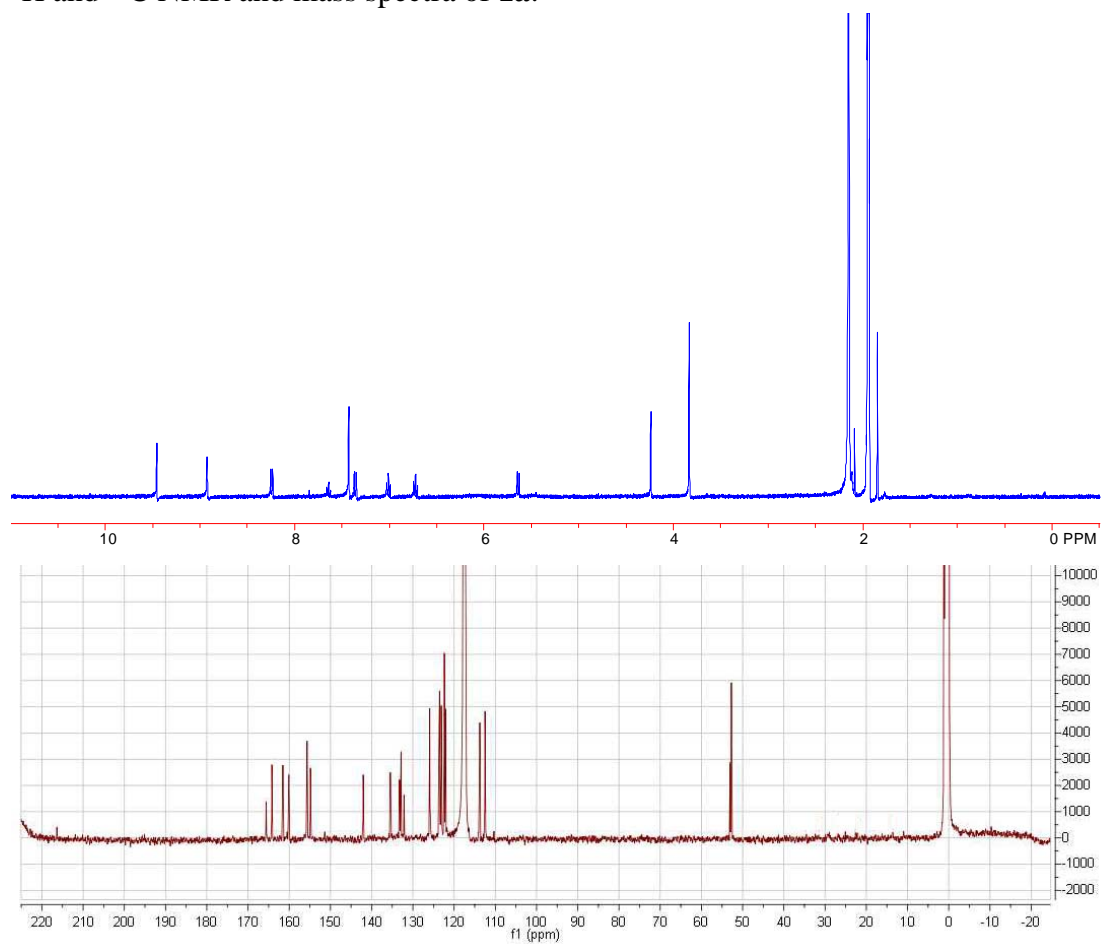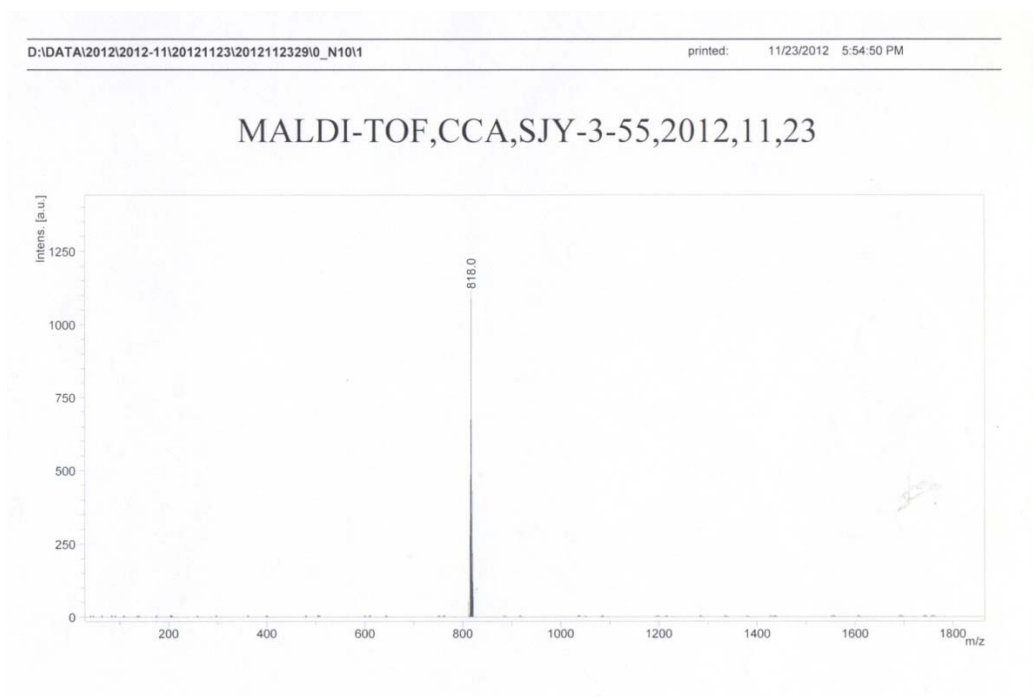

$^1\text{H}$  and  $^{13}\text{C}$  NMR and mass spectra of **2a**:

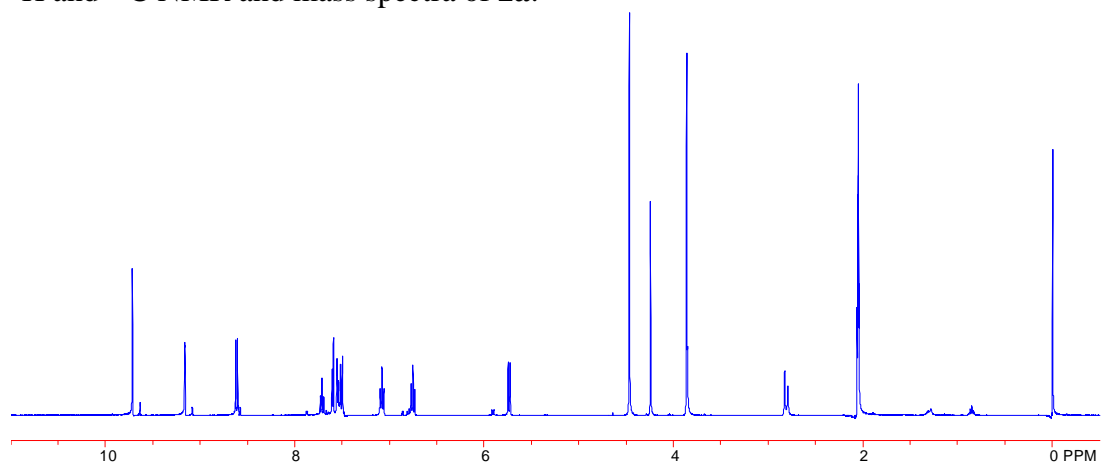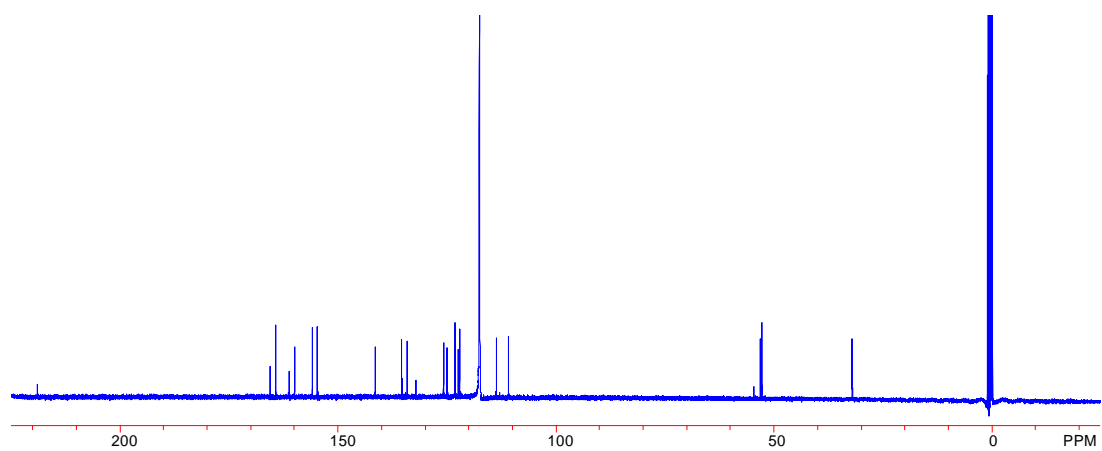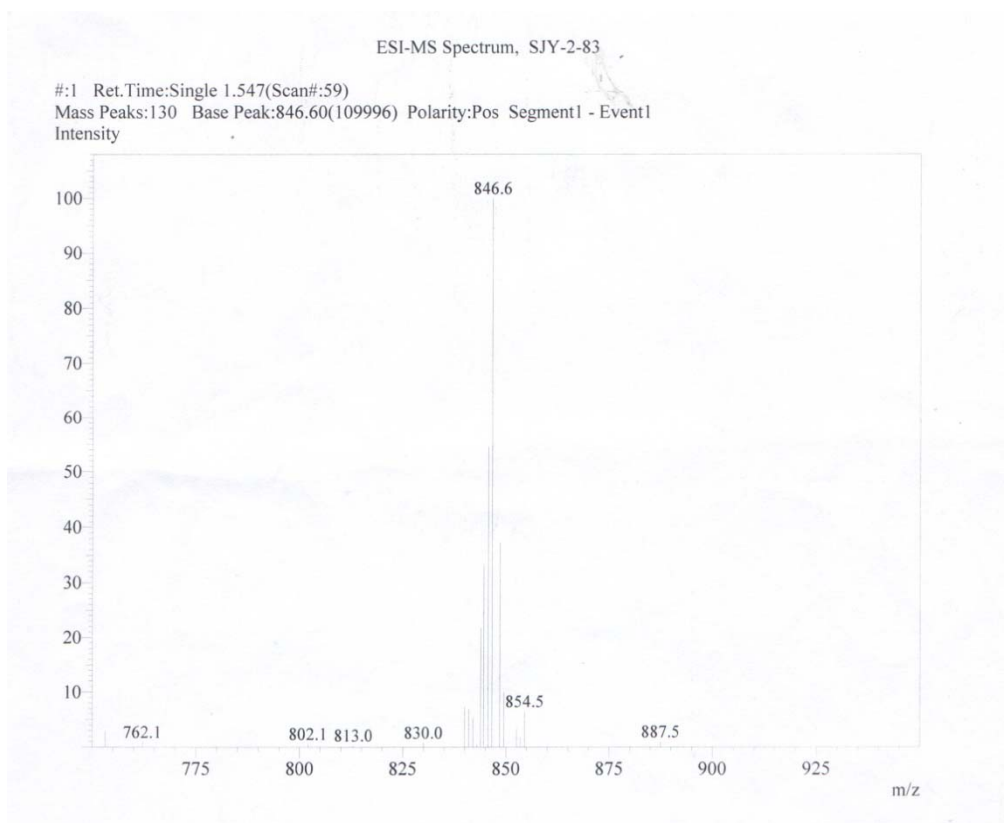

$^1\text{H}$  NMR and mass spectra of **3a**:

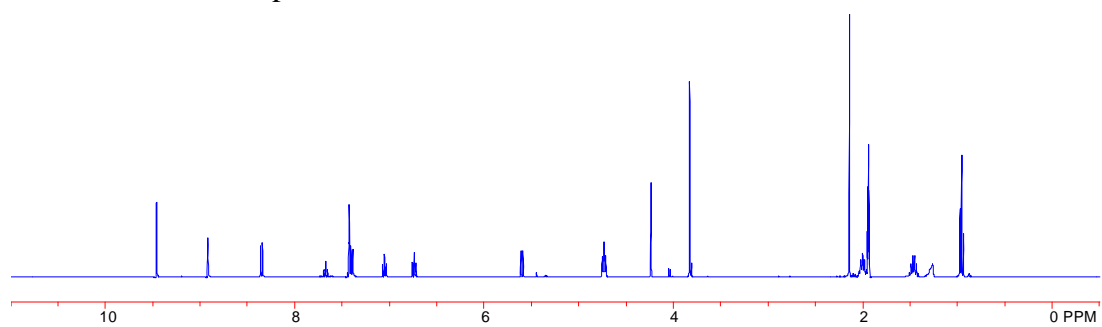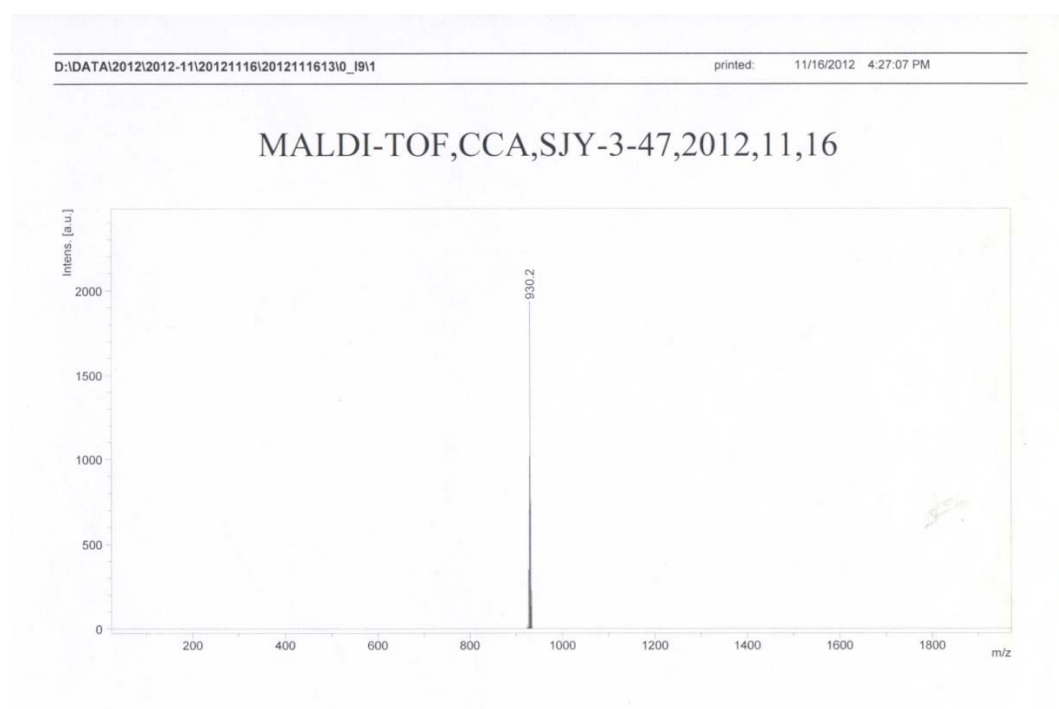



$^1\text{H}$  NMR,  $^{13}\text{C}$  NMR, and mass spectra of **4a**:

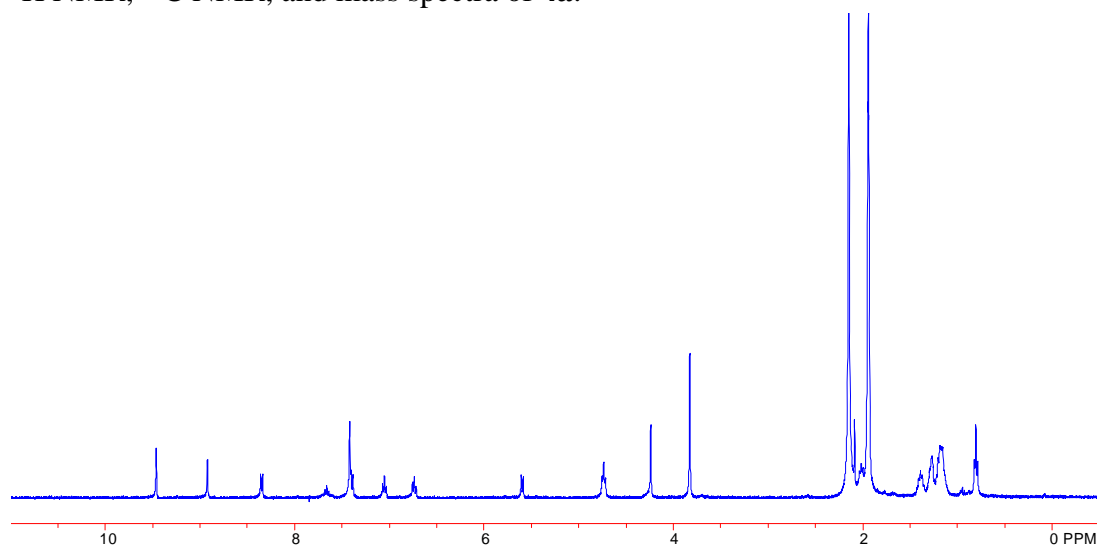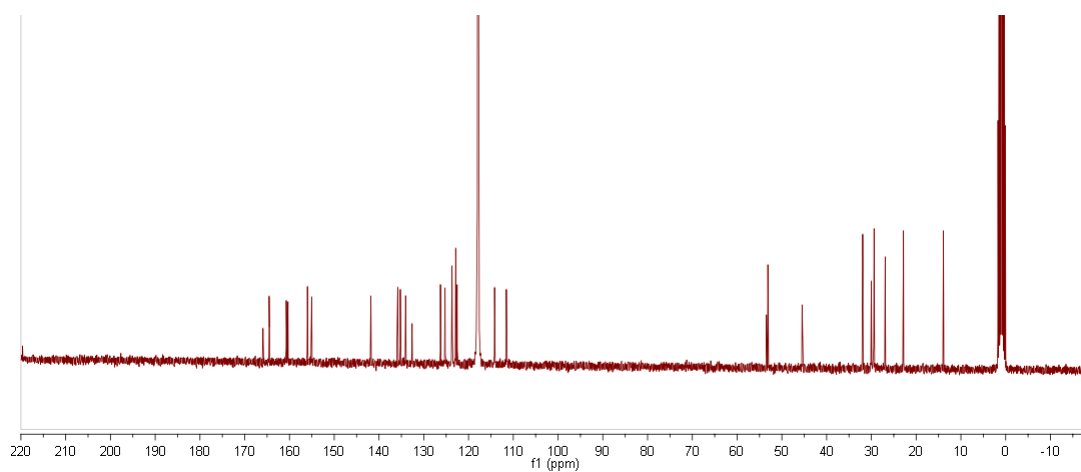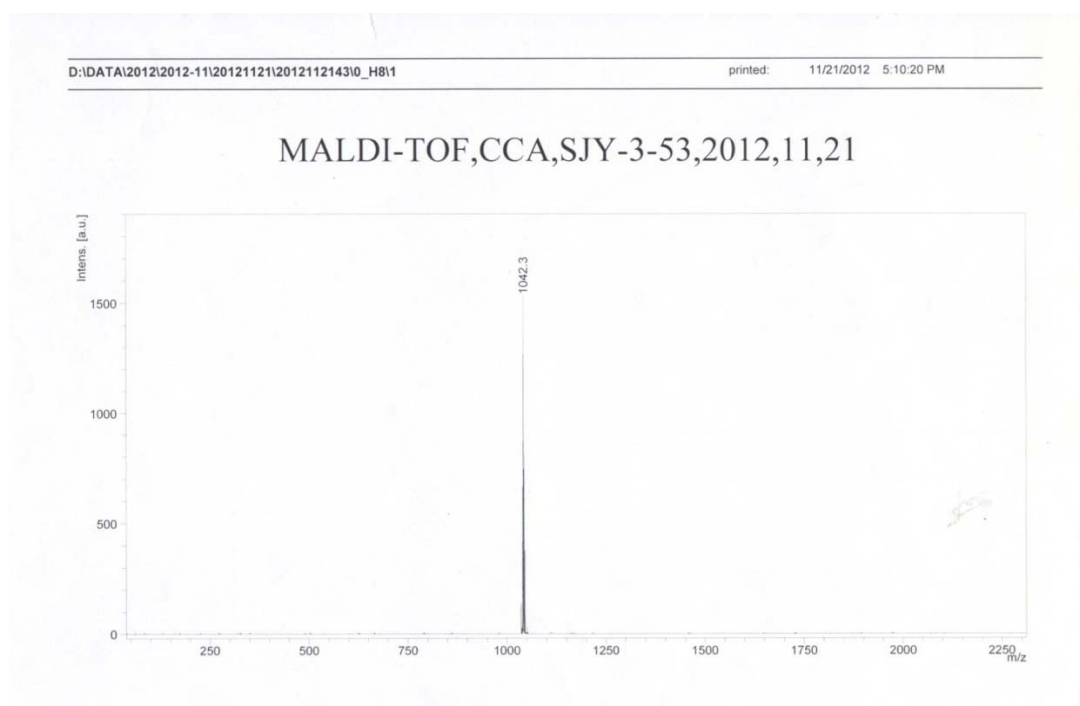

$^1\text{H}$  and  $^{13}\text{C}$  NMR and mass spectra of **5a**:

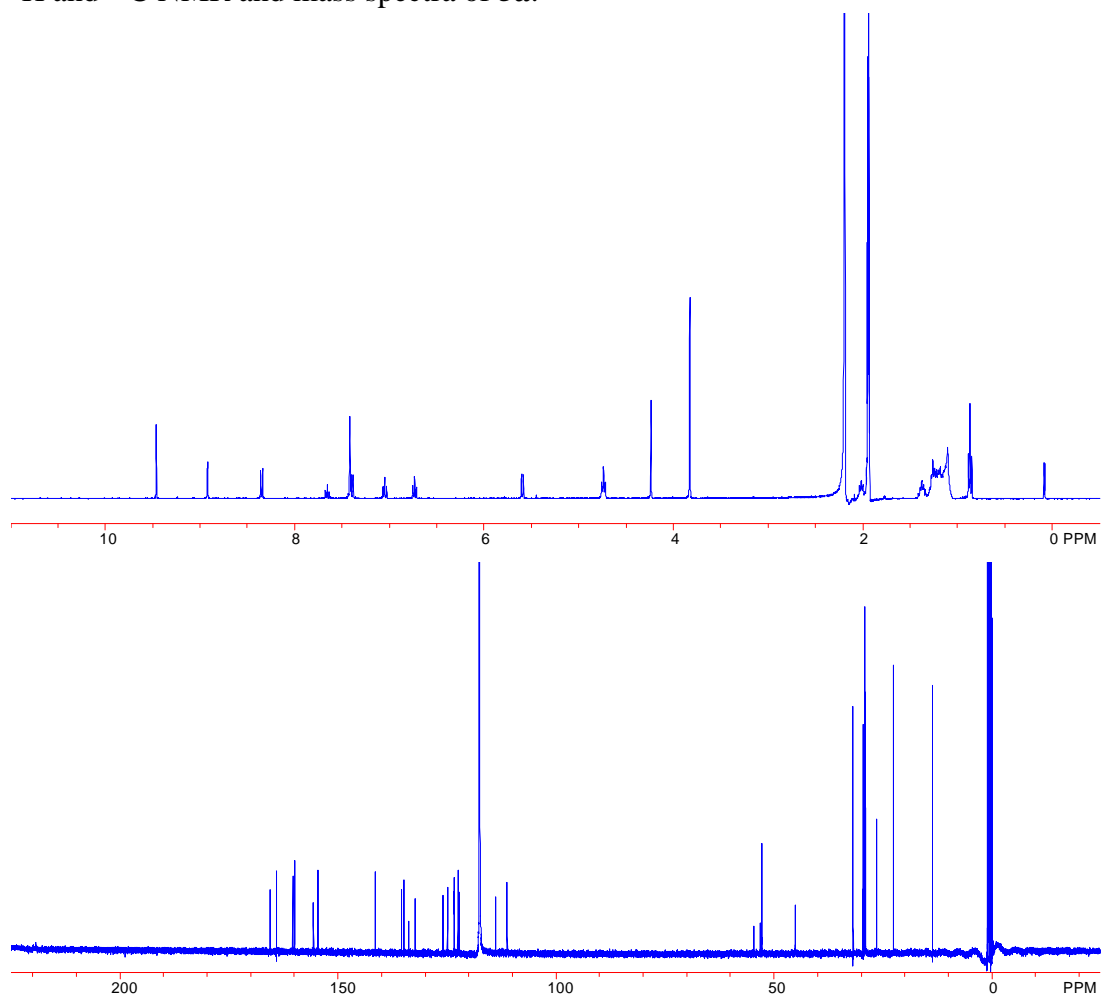

D:\Data\_IC\2012\2012-10\20121026\2012102618\0\_F2111

printed: 10/26/2012 1:52:18 PM

MALDI-TOF,CCA,SJY,2012,10,26

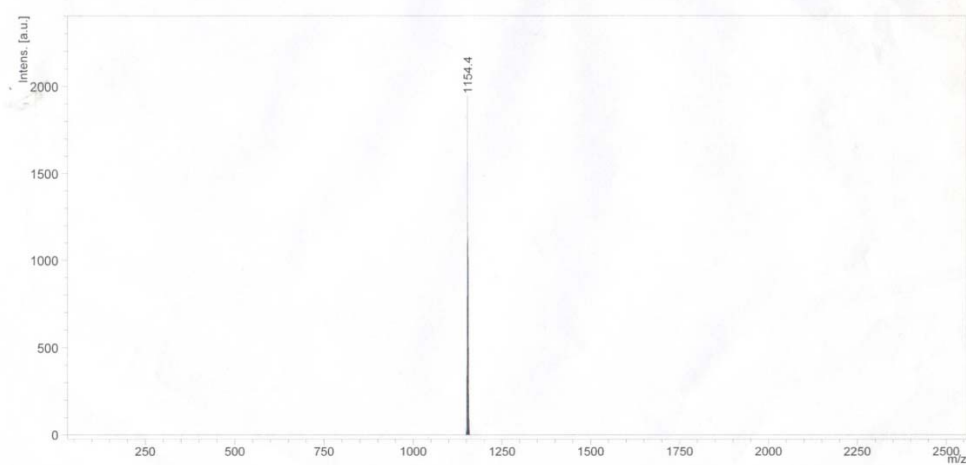

# <sup>1</sup>H NMR and mass spectra of **1b**:

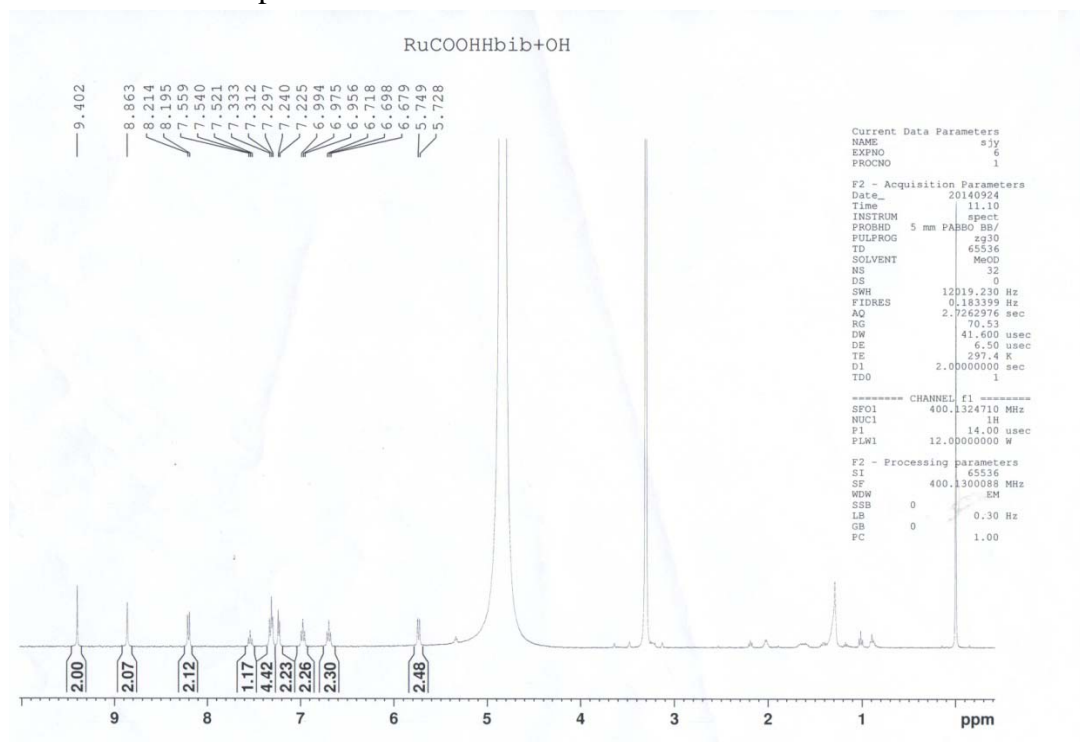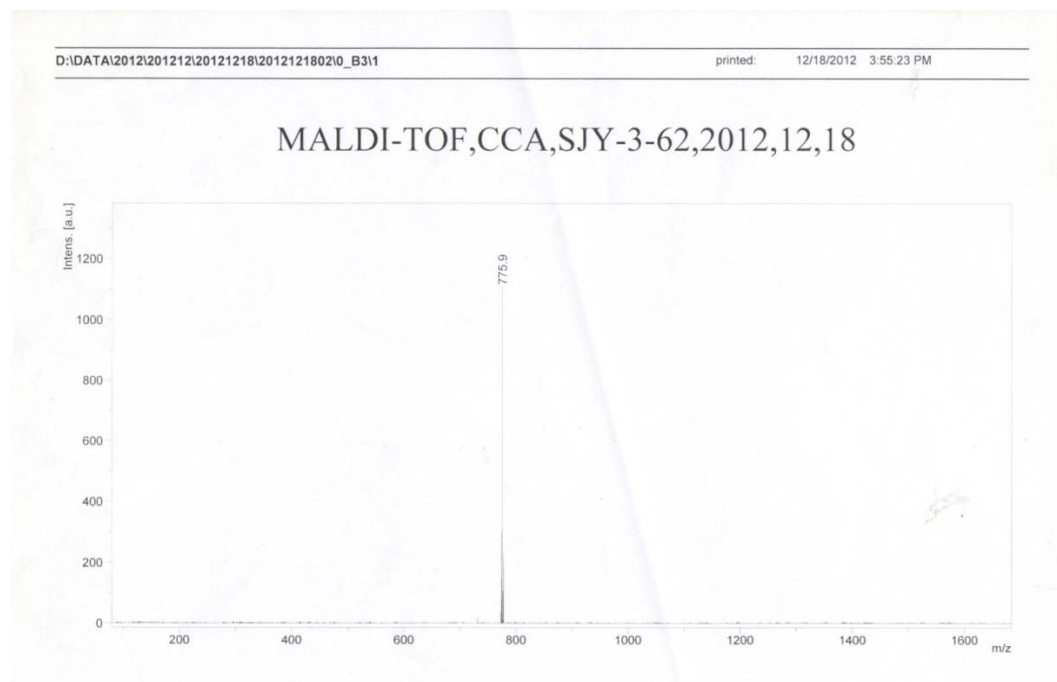

$^1\text{H}$  NMR and mass spectra of **2b**:

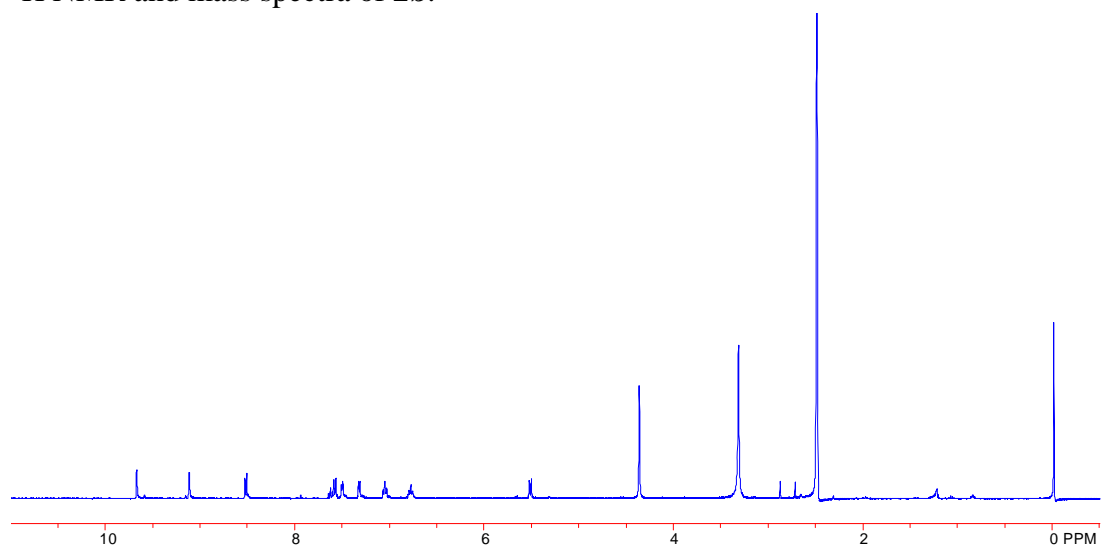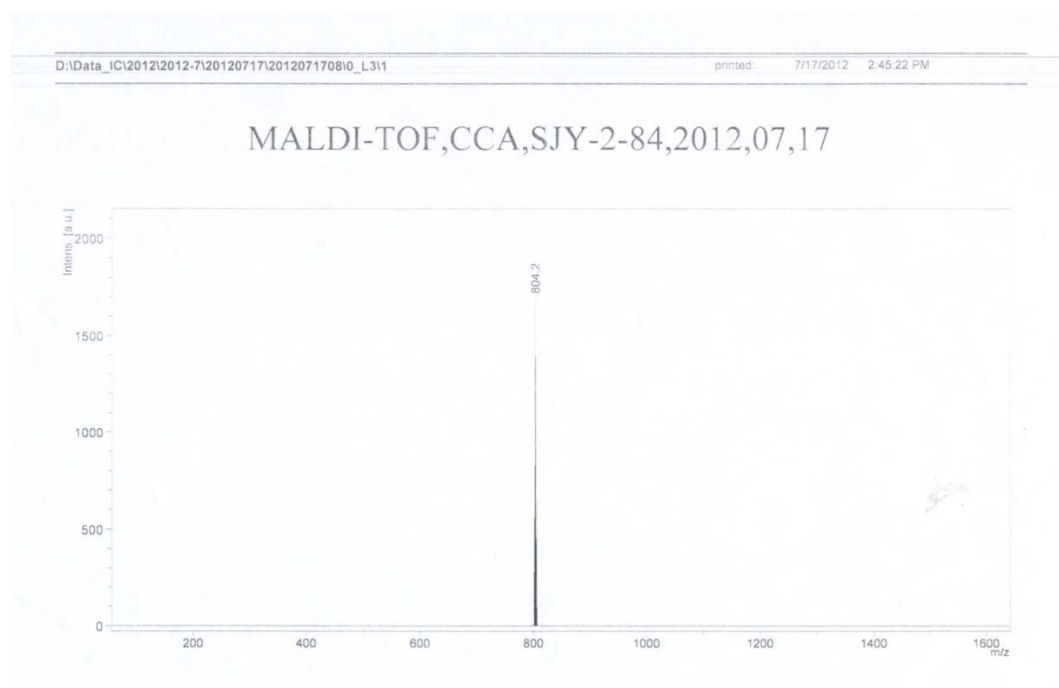

$^1\text{H}$  NMR and mass spectra of **3b**:

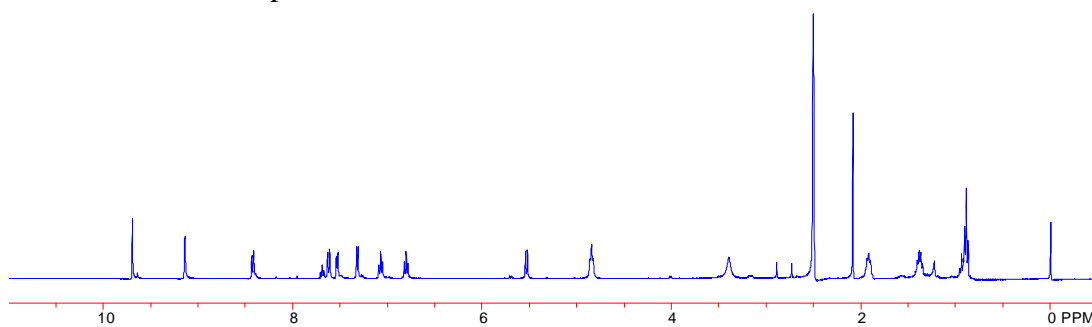

D:\DATA\2012\12\20121217\201212170610\_N611

printed: 12/17/2012 4:54:23 PM

MALDI-TOF,CCA,SJY-61,2012,12,17

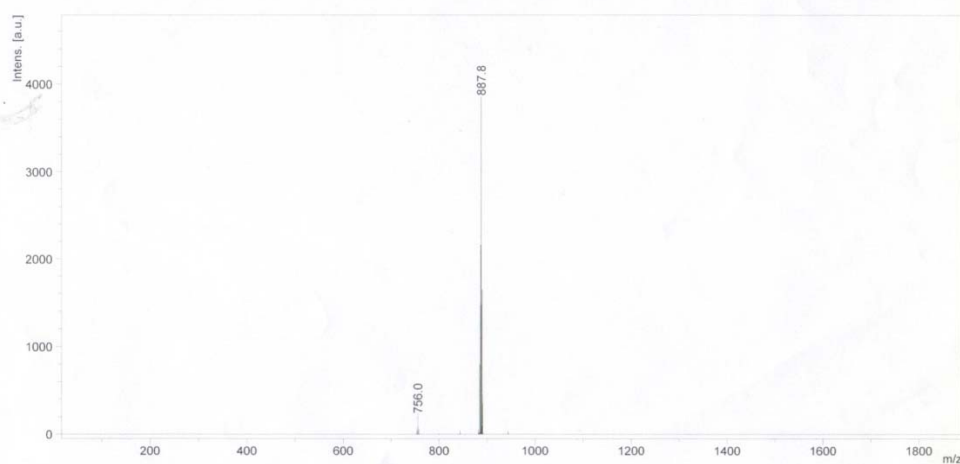

<sup>1</sup>H NMR and mass spectra of **4b**:

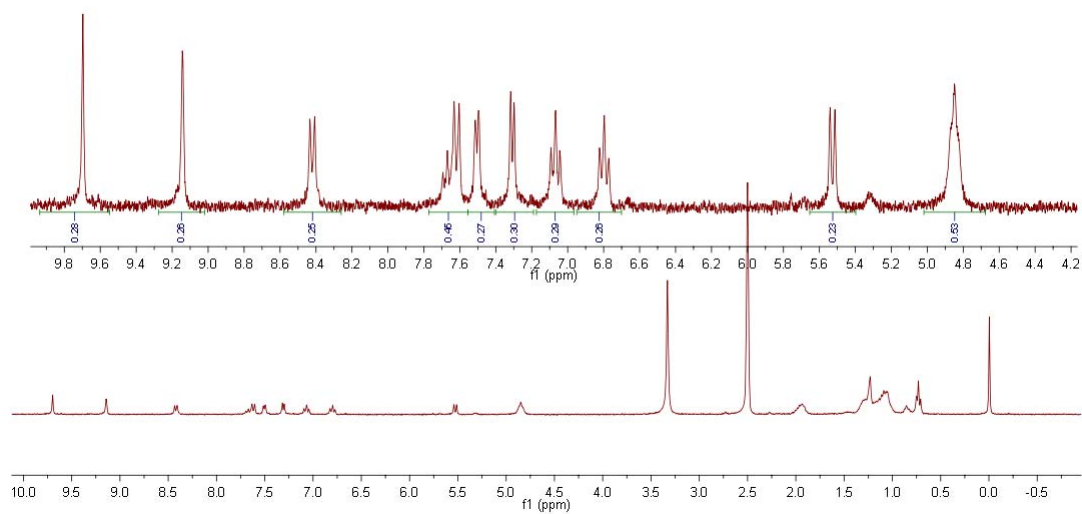

D:\DATA\2012\201212\20121217\201212170710\_N711

printed: 12/17/2012 4:54:57 PM

MALDI-TOF,CCA,SJY-60,2012,12,17

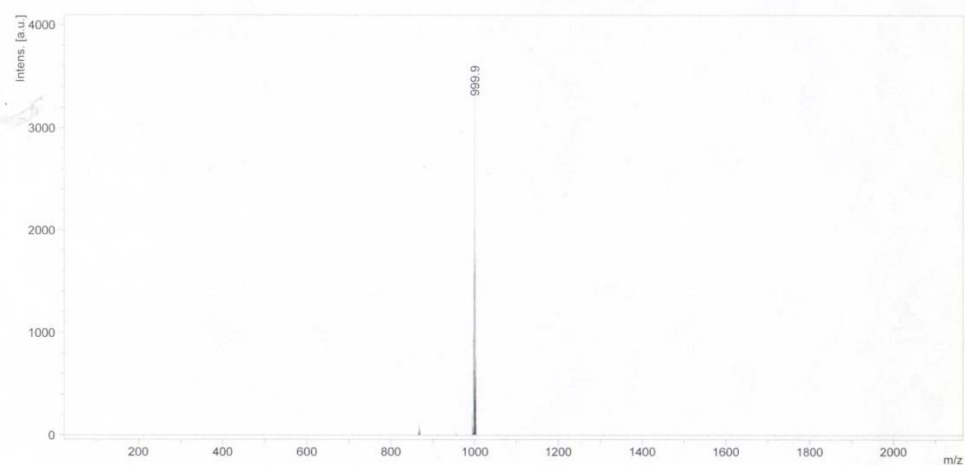

$^1\text{H}$  NMR and mass spectra of **5b**:

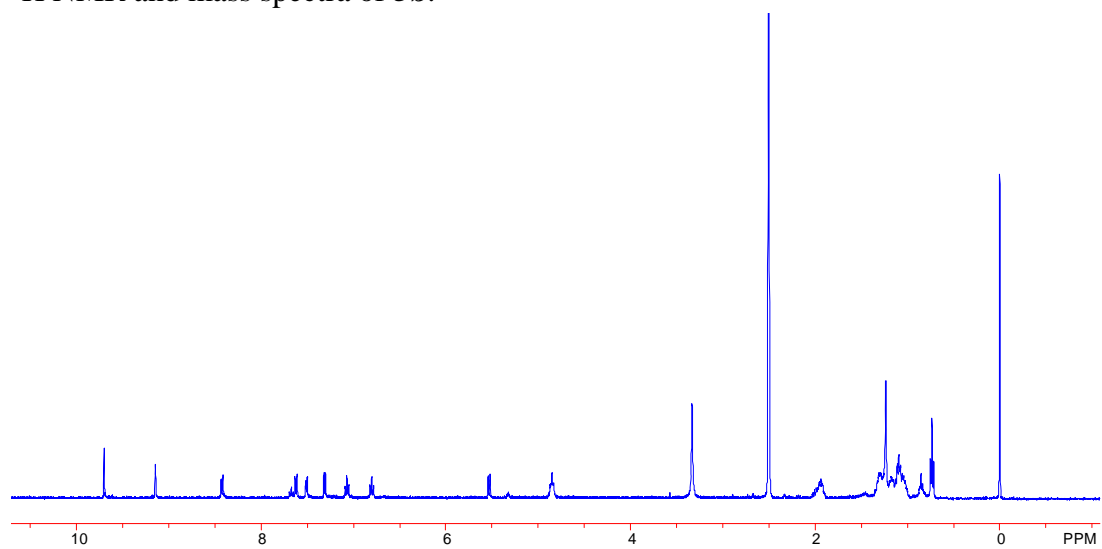

D:\Data\_ICI\2012\2012-10\20121031\2012103124\0\_BB1

printed: 10/31/2012 4:49:45 PM

MALDI-TOF,CCA,SJY-3-33,2012,10,31

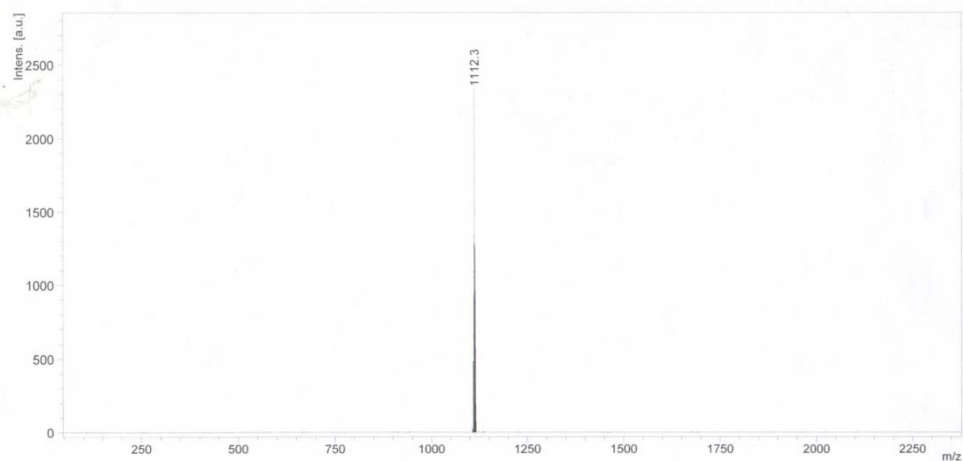

Cartesian coordinates for the DFT-optimized structure of **2a<sup>+</sup>** by B3LYP:

Charge = 1 multiplicity = 1

|    |             |             |             |
|----|-------------|-------------|-------------|
| Ru | -5.45247277 | 0.03327998  | 0.04324143  |
| N  | -4.93658612 | 0.59900400  | 2.04558454  |
| N  | -3.35079392 | 1.00050024  | 3.57678948  |
| N  | -5.01438133 | -0.55281000 | -1.97028896 |
| N  | -3.48921814 | -1.02097776 | -3.54330828 |
| C  | -5.56546582 | 0.94755720  | 3.22677243  |
| C  | -6.92439432 | 1.06870016  | 3.54662883  |
| C  | -7.25513560 | 1.44561396  | 4.84452641  |
| C  | -6.26037720 | 1.69854061  | 5.81119494  |
| C  | -4.90564818 | 1.58265405  | 5.50822419  |
| C  | -4.57550247 | 1.20422806  | 4.20393265  |
| C  | -2.04344668 | 1.14640712  | 4.20780880  |
| C  | -3.60916940 | 0.64008872  | 2.28076704  |
| C  | -2.70660098 | 0.31474499  | 1.18216844  |
| C  | -3.44346484 | -0.00506539 | 0.01586410  |
| C  | -2.75216870 | -0.35370732 | -1.17009461 |
| C  | -1.34697728 | -0.38057904 | -1.18670154 |
| C  | -0.63980266 | -0.05880326 | -0.02343979 |
| C  | -1.30152646 | 0.28817347  | 1.15919831  |
| C  | -3.69673344 | -0.64648869 | -2.24214327 |
| C  | -2.20703937 | -1.22332779 | -4.20917216 |
| C  | -4.73809384 | -1.17814970 | -4.13523606 |
| C  | -5.11965849 | -1.54735820 | -5.42811284 |
| C  | -6.48594562 | -1.60926529 | -5.69269384 |
| C  | -7.44232264 | -1.31289299 | -4.69995118 |
| C  | -7.06040266 | -0.94586081 | -3.41327615 |
| C  | -5.68936204 | -0.87923342 | -3.13203671 |
| H  | -7.69050248 | 0.87560001  | 2.80400225  |
| H  | -8.30070957 | 1.54759619  | 5.11992197  |
| H  | -6.55481883 | 1.99084718  | 6.81471323  |
| H  | -4.14846089 | 1.78076948  | 6.25974711  |
| H  | -1.46658162 | 1.93823106  | 3.72290232  |
| H  | -2.18953538 | 1.41336834  | 5.25371560  |
| H  | -1.48889646 | 0.20582066  | 4.16384271  |
| H  | -0.78909090 | -0.64439913 | -2.07781959 |
| H  | -0.70931898 | 0.52981149  | 2.03423057  |
| H  | -2.39321227 | -1.48964483 | -5.24886062 |
| H  | -1.61350894 | -0.30604313 | -4.18688089 |
| H  | -1.64970168 | -2.03551806 | -3.73520895 |
| H  | -4.39240088 | -1.77831500 | -6.19962538 |
| H  | -6.81988906 | -1.89277091 | -6.68632875 |
| H  | -8.49842316 | -1.37307182 | -4.94593884 |



|   |              |             |             |
|---|--------------|-------------|-------------|
| H | -7.79645477  | -0.71892934 | -2.65002292 |
| H | -4.58995761  | 5.01719639  | -1.37836562 |
| C | -5.36065687  | 4.28444181  | -1.17113656 |
| C | -6.72108050  | 4.60229505  | -1.23383284 |
| C | -4.98718052  | 2.99706666  | -0.80087065 |
| H | -3.94324749  | 2.71736616  | -0.72824693 |
| C | -7.64832282  | 3.60997747  | -0.90824608 |
| N | -5.87504044  | 2.02768216  | -0.51518113 |
| H | -8.70475614  | 3.84810758  | -0.92193306 |
| C | -7.21547054  | 2.32920312  | -0.56989200 |
| C | -8.14080025  | 1.22478829  | -0.24217818 |
| H | -10.05596526 | 2.19470525  | -0.48064995 |
| C | -9.53620504  | 1.27665583  | -0.23796765 |
| N | -7.50602330  | 0.07312007  | 0.07258409  |
| N | -5.93433655  | -1.94323869 | 0.62041048  |
| H | -4.02565062  | -2.70935471 | 0.77037163  |
| C | -8.17516110  | -1.05137399 | 0.42111138  |
| C | -10.25438334 | 0.12780314  | 0.11913017  |
| C | -5.07684414  | -2.94652047 | 0.88024268  |
| C | -7.28292900  | -2.18976954 | 0.72381610  |
| C | -9.56765050  | -1.04284221 | 0.47243927  |
| C | -5.48894933  | -4.21618440 | 1.27062521  |
| C | -7.75544856  | -3.45060478 | 1.08290706  |
| H | -4.74190145  | -4.97901705 | 1.45514926  |
| H | -10.13235057 | -1.91480931 | 0.77855793  |
| C | -6.85811550  | -4.47810166 | 1.38206128  |
| H | -8.81984341  | -3.64502013 | 1.13188803  |
| C | -7.42158021  | -5.84050453 | 1.68152531  |
| O | -6.90327184  | -6.58124251 | 2.67384109  |
| O | -8.33199580  | -6.29182949 | 1.01514090  |
| C | -7.23994949  | 5.98755389  | -1.50792368 |
| O | -8.11575948  | 6.46658519  | -0.81493389 |
| O | -6.71857490  | 6.71817024  | -2.50621947 |
| C | -11.75011628 | 0.12558095  | 0.26878073  |
| O | -12.27646814 | -0.40239129 | 1.22873150  |
| O | -12.52100571 | 0.73960279  | -0.64545322 |
| H | 0.44562351   | -0.07915481 | -0.03863969 |
| C | -6.07858556  | -6.02757922 | 3.72251077  |
| H | -5.02215813  | -6.15474083 | 3.47620847  |
| H | -6.30352473  | -4.97376761 | 3.89579441  |
| H | -6.31656413  | -6.60581273 | 4.61595496  |
| C | -12.07558870 | 1.03584717  | -1.98695303 |
| H | -11.76967546 | 2.08209341  | -2.05740272 |
| H | -11.25880457 | 0.38032739  | -2.29411183 |

|   |              |            |             |
|---|--------------|------------|-------------|
| H | -12.94204385 | 0.86711016 | -2.62773166 |
| C | -5.94646048  | 6.14481087 | -3.58392166 |
| H | -4.87919895  | 6.23382330 | -3.36971452 |
| H | -6.21279925  | 5.10074116 | -3.75746607 |
| H | -6.19169000  | 6.73785193 | -4.46566174 |
